# Supplementary material for: Molecular Characterization and Genotype-phenotype Correlations of SYNGAP1 Variants in a Polish Pediatric Cohort With Neurodevelopmental Disorders
Source: Research Square preprint supplement (doi:10.21203/rs.3.rs-7635804/v1), 2025-10-17
Supplement: Supplementary file 1 [file 2a122bba2e438d7ed022d1bf.docx]

Table 2B. Epilepsy and EEG parameters of the Polish SYNGAP1 group.

| Feature | Scoring Definition |
| --- | --- |
| Seizures (type) | 0 — none; 1 — absence; 2 — myoclonic; 3 — tonic-clonic; 4 — seizures only during sleep |
| EEG findings | 0 — normal; 1 — generalized seizure discharges; 2 — focal or atypical abnormalities |
| Antiepileptic drug use | Encoded as binary (0 — no use; 1 or more — number of medications prescribed) |
| Epileptic encephalopathy | 0 — not diagnosed; 1 — diagnosed by clinician |
