# Supplementary material for: Molecular Characterization and Genotype-phenotype Correlations of SYNGAP1 Variants in a Polish Pediatric Cohort With Neurodevelopmental Disorders
Source: Research Square preprint supplement (doi:10.21203/rs.3.rs-7635804/v1), 2025-10-17
Supplement: Supplementary file 2 [file 51ed935ec3a67fec27849d2f.docx]

Table 2D. Early-onset and additional features of the Polish SYNGAP1 group.

| Feature | Scoring Definition |
| --- | --- |
| Onset in infancy | 0 — no abnormalities in infancy; 1 — mild signs; 2 — significant developmental red flags |
| Sensory integration disorder | Not scored numerically; described qualitatively based on parental and clinical reports |
