# Supplementary material for: Molecular Characterization and Genotype-phenotype Correlations of SYNGAP1 Variants in a Polish Pediatric Cohort With Neurodevelopmental Disorders
Source: Research Square preprint supplement (doi:10.21203/rs.3.rs-7635804/v1), 2025-10-17
Supplement: Supplementary file 3 [file 5f563870568b4c9fe0ee5f04.docx]

Table 4. Variant Class and major clinical scores.

| Variant Type | ID/DD Score Pattern | Epilepsy Score | Behavioral/ASD Score | Clinical Remark |
| --- | --- | --- | --- | --- |
| Truncating | High (2–3) | High (all seizure types, >1) | 2–3 | No distinct subphenotype |
| Splice-site | High (2–3) | High | 2–3 | Mirrored truncating phenotype |
| Missense (critical) | High (2–3) | High | 2–3 | Comparable to other loss-of-function |
