# Supplementary material for: Molecular Characterization and Genotype-phenotype Correlations of SYNGAP1 Variants in a Polish Pediatric Cohort With Neurodevelopmental Disorders
Source: Research Square preprint supplement (doi:10.21203/rs.3.rs-7635804/v1), 2025-10-17
Supplement: Supplementary file 4 [file 71a24fcc027eec3b028eb94f.docx]

INTELLECTUAL DEVELOPMENTAL DISORDER, AUTOSOMAL DOMINANT 5; MRD5 - Neurological and behavioral characteristics of Polish patients

**INHERITANCE**

- Autosomal dominant

**part 4 (pts 22-30)**

| **L.P** |  | **22** | **23** | **24** | **25** | **26** | **27** |
| --- | --- | --- | --- | --- | --- | --- | --- |
| **1** | **inicjały Dziecka + data diagnozy + nazwisko lekarza** (opcja, jeśli jest jako prowadzący) | M.L. (2012)  Marcin Leśny  2023 (11 lat) | J.K (2018)  Jan Kubat  2023 (4,5 roku)  Currently under care of: Klinika Neurologii Rozwojowej Wieku Dziecięcego Uniwersyteckie Centrum Kliniczne, Gdański Uniwersytet Medyczny. | K L (2007)  Kajetan Licau  2015( 8,5 roku)  Referring physician Neurologist Mariola Rudzka-Dybała specialist in pediatric neurology Institute of Mother and Child in Warsaw  Geneticist – Anna Kutkowska-Kaźmierczak Institute of Mother and Child in Warsaw | K. M. (2021)  Karol Michalik  2023 (2 lata) | J.K. (2018)  Julia Kierpiec  2023 (5 lat.)  Barbara Achtelik-Frolik | I.B.  Igor Berhard (2013)  2022 (9 lat) |
| **2** | **HEAD & NECK** |  |  |  |  |  |  |
| **3** | *Head*  - Microcephaly (in some patients)  0 - absent  1- present  małogłowie | 0 | 0 | 0 | 0 | 0 | 0 |
| **4** | *Neck*  - Torticollis (in some patients)  0 – absent  1- present  kręcz szyi | 0 | 0 | 0 | 0 | 0 | 0 |
| **5** | **NEUROLOGIC** |  |  |  |  |  |  |
| **6** | *Central Nervous System* |  |  |  |  |  |  |
| **7** | - Hypotonia  0 - normal  1 - reduced in long axis  2 - increased in limbs/contractions  (> 1 answer possible)  obniżone napięcie mięśni | 0 | 1  Muscle hypotomy, joint hypermobility | 1 | 1  Reduced muscle tone in the center | 1,2  From 14 years of age rehabilitation due to increased muscle tension in the extensors, asymmetrical (greater on the left side of the body, e.g. clenched fist), from approximately 18 months of age Decreased tension in the center was found | 1,2  Increased generalized laxity, decreased muscle tone in the center, increased in the limbs, ligaments do not hold |
| **8** | - Delayed development  0 - no delays  1 - minor delays  2 - significant delays  opóźnienie rozwoju | 0 | 2  Delay in range of motion:  no crawling without rehabilitation, 14 months of age - moves into the position of all fours (does not crawl on all fours), 16/17 months of age (rehabilitated) begins to crawl on all fours.  8 months of age sitting down without holding the body properly/unstably, 13 months of age crawling, 18 months old, stands alone, 25 months old going,  Walking with varying intensity, clumsy, as if the center of gravity of the body was disturbed.  Overall skill and cognitive delay, including fine and gross motor skills.  Delay in independence.  Aphasic speech disorders. | 2  12 months - no crawling, 12-14 months - sitting independently; lack of speech; gait unstable | 2  10 months of age sitting independently, 25 months of age walking, unsteady gait on a wide base, feet with a lowered longitudinal arch, "searching toe" adduction of the forefoot, lack of speech, single onomatopoeic words at the age of 2.5 years, requires support in daily hygiene activities, does not eat independently, is diapered. | 2  Sitting independently - 12 months of age, crawling around 14-15 months of age, walking 21 months of age, no speech, no imitation. | 1  No eye contact, did not crawl, after rehabilitation, sat up at 9 months, speech at 5 years of age. |
| **9** | - Intellectual disability, mild to severe  0 - no  1- mild  2 - moderate  3 - severe  niepełnosprawność intelektualna  !! po 6 roku życia (wcześniej mówimy o opóźnieniu rozwoju) | 1 | 2  Developmental delay, decision on the need for special education | 3  Deep level – rehabilitation and educational group | 2 | 2  moderate degree in the decision on special education | 1 |
| **10** | - Developmental regression  0 - none  1- observed  regres rozwoju | 0 | 1  For example loss of vocabulary, regression of skills, worsening of SI disorders (e.g. a child splashes in the pool, strokes the water after a while) | 0 | 1  Loss of speech at the age of 1.5 years, loss of skills after fever | 1  Approx. 7 months of age stopped babbling at 13 months of age (from the day of MMR vaccination) the child completely rejected the extended diet and drank only milk. To this day, a child learns actions or speaks syllables, and after some time it completely disappears - no reason is found. | 0  He often forgets what he read or studied at school, he forgets letters, |
| **11** | - Seizures (morphology)  0 - no seizures  1 - absence  2 - mioclonus  3 - tonic-clonic seizures  4 - only seizures during sleep  drgawki/padaczka (rodzaj napadów) | 0 | 2,3  EEG – quite significant generalized changes with paroxysmal features during falling asleep, light and deep sleep. Changes that intensify as sleep deepens.  Convulsions – accompanying infection / during convulsions without fever.  Numerous stereotypical behaviors, whole body tension, falls, myoclonus of the eyelids (secondary).  During epilepsy treatment, the EEG result improves / behavior improves / stereotypy decreases significantly (ticks such as tapping on the head, flexing of limbs, etc.). | 1,2,3  Nioclonic-astatic seizures. Seconds of loss of consciousness. Thanks to the selection of medications, it is now sporadic. | 2  Seizures recorded on EEG, eyelid myoclonus, normal recording of sleep phases | 1,2,3  Atonic seizures (shortening of the legs) last one second, the child immediately returns to his previous activity. | 1,2  He sometimes freezes and rolls his eyes, and in his early childhood he had undiagnosed, painful calf cramps  EEG without seizure changes |
| **12** | - EEG abnormalities (describe)  0 - normal  1 - generalised seizure changes  2 - other seizure changes  zapis EEG | 0  Abnormal recording, age specific, no seizures | 1,2  BEFORE TREATMENT:  1) during the period of drowsiness, the share of slow theta waves of 4-5 Hz with an amplitude of up to 270 mcV increases. Then sharp apical waves, quite numerous, usually extremely expressed, sleep spindles, usually sparsely expressed, fragmented, with features of physiological asymmetry and asynchrony. As the examination continues, the recording begins to be dominated by polymorphic slow activity in the theta 4 Hz range with amplitudes up to 150 mcV and delta 1-3 Hz with amplitudes up to 500 mcV. In light and medium-deep sleep, generalized polymorphic groups consisting of sharp waves, slow waves and sharp-slow wave complexes with amplitudes up to 715 mcV are repeatedly recorded.  2) sharp apical waves, usually extremely expressed, sleep spindles weakly expressed, sparse, fragmented, with features of physiological asymmetry and asynchrony. As the examination continues, the recording begins to be dominated by polymorphic slow activity in the theta 4 Hz range with amplitudes up to 150 mcV and delta 1-3 Hz with amplitudes up to 720 mcV. In light and medium-deep sleep, generalized polymorphic groups consisting of sharp waves, slow waves and sharp-slow wave complexes with amplitudes up to 575 mcV are repeatedly recorded.  During HW - suspicious generalized short series of slow waves with a sharpened pattern and an amplitude of up to 200 uV.  Bioelectrical features of sleep are present, modified by overlapping paroxysmal discharges, generalized paroxysmal discharges in the form of sharp waves, slow and sharp wave complexes with an amplitude of up to 700 uV, increasing as sleep deepens. | 1  Numerous generalized, multifocal and diffuse seizure lesions. | 1,2  Normal bioelectrical features of drowsiness and sleep. Sleep phasing was preserved, there was a record of generalized changes with a predominance of the left side, of a paroxysmal nature. FS intensifies changes. | 1,2  The bioelectrical features of drowsiness and sleep are quite well expressed/but atypical - visible against the background of irregular slow activity of 2-7 c/s with an amplitude of up to 500uV:  - paroxysmal hypersynchrony of falling asleep/generalized discharges of exacerbated slow waves 3-5 c/s up to 700 uV with a component of atypical spike-wave complexes,  - sharp apical waves,  - regular, synchronous sleep spindles 11-12 Hz/including slow, extreme sleep spindles 8-10 Hz up to 400 uV,  - numerous K complexes, including an age-untypical increase in k complexes and K complexes as generalized discharges of sharpened slow waves of 3-4 c/s with a component of spike-wave complexes associated with sleep spindles.  In addition, the following were recorded:  - bilaterally in the central-parietal and temporal areas (L>P), synchronously single sharp wave - slow wave complexes up to 250 uV.  FS activation does not intensify seizures.  Deepening sleep does not intensify seizures.  EEG recording abnormal in spontaneous sleep:  - atypical bioelectrical features of drowsiness and sleep,  - paroxysmal, generalized and bilateral (L>P), localized disturbances of bioelectrical activity of the brain. | 0  Abnormal recording, age specific, no seizures, slow waves |
| **13** | - Antiepileptic drugs (current and earlier)  stosowane obecnie i wcześniej leki p/padaczkowe | 0 | 3 | 22 - SYNACTHEN DEPOT  medications administered – 2,3,4,9  Ketrel; Rispolept | 2 – elimination of eyelid myoclonus, visible improvement in development | 2 – within a week there was a strong photosensitivity reaction - discontinued  4 | 0 |
| **14** | - Epileptic encephalopathy (if diagnosed)  0 - absent  1 - observed  encefalopatia padaczkowa (czy jest rozpoznana) | 0 | G.40 – for further observation towards | 1 | 1 | 0 | 0 |
| **15** | - Brain MRI or CT scan  0 - normal  1 - minor changes (no significant clinical significance)  2 -serious malformations  zmiany w badaniu MR lub TK głowy | 1  MRI is clear with a relatively wide sagittal sinus, sinus confluence and left transverse sinus | 0 | 0 | 1  Magnetic resonance imaging was normal, a small cyst in the pineal gland was revealed - without diagnostic significance. The corpus callosum is homogeneous with a slightly narrower posterior part of the trunk - on the borderline of normal. Slight asymmetry of the ventricular system in the form of a slightly wider triangle of the occipital and temporal corners of the left lateral ventricle - anatomical variant  Cyst on pineal gland | 1  MRI of the brain under general anesthesia revealed a small pineal gland cyst, areas of incomplete demyelination and an enlarged adenoid.  Cyst on pineal gland | 0 |
| **16** | *Behavioral Psychiatric Manifestations*  - Autism spectrum disorder  0 - none  1 - ASD diagnosed [stereotypic behaviours such as hand flapping, obsessions with certain objects and poor social development. In addition, inattention, impulsivity, aggressive behaviour directed at self and others, elevated pain threshold, auditory hypersensitivity and sleep disturbance].  2 - confirmed autism  3 - behavioural disorders without diagnosis of autism or ASD  4 - other  zaburzenia ze spektrum autyzm | 0  Autism excluded, in early childhood periodic stereotypes (about 3 months) – clapping hands. He walks on his toes. High pain threshold  Speech at the age of approximately 6-7 years. Still incoherent. He is communicative and independent.  The child’s biggest problem is intellectual disability | 0 | 3  Biting fingers. Spinning rollers or wheels. Uncontrolled outbursts of joy/screaming. No speech – except MOM, DAD, YAAAA (for the meaning of YES), | 3  Behavioral disorders  Sensory integration disorders, echolalia, motor stereotypies, screams and squeals instead of speech, simple syllables and simple onomatopoeic words, ear plugging, tapping and knocking on objects, salivation, sticking out the tongue, fits of anger and self-aggression, nipping and biting in response to refusal . He begins to understand simple commands, points with his finger. The caregiver's hand is often used for communication. | 3  SI disorders, likes playing and glowing objects and books, bites when excited or angry, hypersensitive to sounds, loves water, doesn't like wind, doesn't speak. Responds to name and interacts with interlocutor. She understands the messages, but she is stubborn and sticks to her opinions - she enforces them by screaming and biting. When falling asleep, he strokes the sheets and grinds his teeth. | 3  Atypical autism |
| **17** | - Behavioral abnormalities (describe) | As above | Stereotypes – ticks (knocking on the head, gnashing of teeth, alternately covering and uncovering the ears, stroking the body) |  | As above |  | He becomes aggressive for any reason, he doesn't catch the eye catastrophe, he covers his ears, he has hearing loss and hypersensitivity, he is afraid to go to the bathroom alone, he doesn't dress himself, he needs to be reminded to eat, otherwise he won't eat or drink on his own. |
| **18** | **MISCELLANEOUS**  - Onset in first years of life  0 - none  1 - minor/single (no diagnostics initiated)  2 -serious (diagnosis has been initiated)  objawy w 1 roku życia | 0  The child was developing normally at the age of 1 year. He sat up for 6 months, rolled over and walked at 13 months of age  From the beginning problems with speech | 2  Hyperextension in the knees, SI disorders, muscle hypotomy, joint hyperflexibility | 1  From birth, calm, apathetic, muted | 2  Reduced muscle tension, physical rehabilitation from 5 months of age No improvement. From 10 months of age Vojta rehabilitation - quick improvement, independent crawling, sitting and standing within 2 months. Lack of ability to walk independently until 2 years of age. Problems with expanding the diet, sticking out the tongue, spitting, choking. No response to name, poor eye contact. Delayed occurrence of hazing and babbling. Cut tongue frenulum at 6 weeks of age. | 2  Increased muscle tension, loss of babbling, delayed motor development (unilateral crawling, sitting at 12 months of age) despite continuous rehabilitation (Vojta method). No imitation. | 1  No eye contact, did not crawl, after rehabilitation, sat up at 9 months, speech at 5 years of age. |
| **19** | - Most mutations occur de novo (yes/no)  mutacja de novo (rodzice jej nie mają) (tak/nie) | Parents are before the examination (planned for May 2024). Checked in SRF database, pathogenic variant | De novo | De novo | De novo | De novo | De novo |
| **20** | **MOLECULAR BASIS** |  |  |  |  |  |  |
| **21** | - Caused by mutation in the synaptic Ras GTPase activating protein 1 gene (SYNGAP1, [603384.0001](https://www.omim.org/entry/603384#0001)) (genetic results)  wynik badania genetycznego (nazwa wariantu) | c.155C>A  p.Ser52Ter | SYNGAP1 C.388-2A>C | c.2993delC  Ex15 p.Pro978Hisfs*99  the presence of mutations in exon 15 of the gene Syngap 1 was tested (NM_006772, GRCh37) | c.2320del  p. Ser774ProfsTer21 | c.1685C>T  p.(Pro562Leu)  6:033440737-C>T | c.895>T  p.Arg299Cys |
| **22** | **Other important clinical notes** (może być po polsku)  0 - none  1- rather not  2 - clear  inne istotne objawy kliniczne | 1  Delayed speech development, intelectual disability, attends an integrated class. He does well in mathematics, English but poorly in Polish, biology, etc. in subjects that require speaking  Problem with expression feelings  Movement problems, swims but not well enough, skis but slower, bike at the age of 6 years, he runs quite erratically | 2  Sleep disorders, impaired auditory processing, social-emotional behaviours (anger, love) expressed in extreme ways | 2  Problem with eye-hand coordination. Trouble keeping the soup on the spoon. Problem with chewing. He loves music. He loves devices such as a mixer, dryer, drill, and vacuum cleaner. | 2  auditory hypersensitivity, deep sensory disturbances | 2  Hypersensitivity to sounds (noise, laughter, crying), problem with extended diet (between 13 and 18 months of age), high pain threshold. | 1  Speech from the age of 5  He has been reading since he was 9 years old.  Unusual cramps in the calves, painful, making it impossible to walk or stand, leg pain, low tone |
| **23** | **Consent for publication of photos (anonymised, in medical publications and scientific conferences)**  **zgoda na ew. publikację zdjęć Dziecka (oczywiście anonimowo), na konferencjach naukowych i w pismach medycznych** | No | Yes | Yes | Yes | No | Yes |

**part 5 (pts 28-30)**

| **L.P** |  | **28** | **29** | **30** | **31** | **32** |  |
| --- | --- | --- | --- | --- | --- | --- | --- |
| **1** | **inicjały Dziecka + data diagnozy + nazwisko lekarza** (opcja, jeśli jest jako prowadzący) | P. Z. (2013)  Piotr Zalewski  2020 (3,5 roku)  Dr M. Bachański | Z.J. (2016)  Zofia Jackowska  2011 (6 lat)  Dr Sylwia Pawlak | H.R. (2018)  Helena Rybicka  2021 (3,5 roku)  Diagnosis prof. Rafał Płoski, Main doctor dr Dorota Domagała - Pakieła |  |  |  |
| **2** | **HEAD & NECK** |  |  |  |  |  |  |
| **3** | *Head*  - Microcephaly (in some patients)  0 - absent  1- present  małogłowie | No | No  Head in the lower limit of normal | No |  |  |  |
| **4** | *Neck*  - Torticollis (in some patients)  0 – absent  1- present  kręcz szyi | No | No | No |  |  |  |
| **5** | **NEUROLOGIC** |  |  |  |  |  |  |
| **6** | *Central Nervous System* |  |  |  |  |  |  |
| **7** | - Hypotonia  0 - normal  1 - reduced in long axis  2 - increased in limbs/contractions  (> 1 answer possible)  obniżone napięcie mięśni | Yes  Decreased muscle tone in the center, increased in the periphery, difficulty in moving, leg valgus | Yes  Overall reduction of muscle tension | Yes |  |  |  |
| **8** | - Delayed development  0 - no delays  1 - minor delays  2 - significant delays  opóźnienie rozwoju | Yes  11 months of age crawling, 16 months sitting, 24 months walking but very unsteady, still often holding the hand  No speech | Yes  The child's development regressed after vaccination (DTP polio hib) in the 5th month of life. She stopped trying to get up, roll over, babbling, and from then on the disability became apparent.  Now every day some acquired skills are lost in favor of new ones, and so on. | Yes  Delayed sitting, 18 months of walking after intensive rehabilitation caused by great unsteadiness and lack of stability (rehabilitation from 15 months of age). No speech, unstable gait, |  |  |  |
| **9** | - Intellectual disability, mild to severe  0 - no  1- mild  2 - moderate  3 - severe  niepełnosprawność intelektualna  !! po 6 roku życia (wcześniej mówimy o opóźnieniu rozwoju) | Yes  Moderate grade in the decision on special education | Yes  Moderate intellectual disability.  According to the person diagnosing, close to significant. | Yes  moderate degree in the decision on special education |  |  |  |
| **10** | - Developmental regression  0 - none  1- observed  regres rozwoju | Yes  In case of infections and long hospital stays  In the absence of continuity in therapy | Yes  Speech often disappears in favor of moaning and crying, recently they have started leaking urine again and relieving themselves at night | No |  |  |  |
| **11** | - Seizures (morphology)  0 - no seizures  1 - absence  2 - mioclonus  3 - tonic-clonic seizures  4 - only seizures during sleep  drgawki/padaczka (rodzaj napadów) | Yes  During wakefulness, the eyeballs turn upwards and a brief loss of consciousness  Myoclonus and upper limb ejection in sleep | Yes  Myoclonic-astatic epilepsy  During infection, single tonic-clonic seizures | Yes  Atonic-myoclonic seizures. After turning on Depakin, the atonic seizures stopped.  Generalized epilepsy G40.3. idiopathic epilepsy and epileptic syndromes. |  |  |  |
| **12** | - EEG abnormalities (describe)  0 - normal  1 - generalised seizure changes  2 - other seizure changes  zapis EEG | Seizures with generalized symptoms, many sharp spikes, despite treatment with pp, increase in the height of the spikes  In EEG, seizures occur mainly in the temporal lobe | Generalized seizure lesions | As above |  |  |  |
| **13** | - Antiepileptic drugs (current and earlier)  stosowane obecnie i wcześniej leki p/padaczkowe | 2,3  Elimination diet for 4 years (gluten-free, lactose-free and severely limited sugar) | 3, Rispolept  Plasma water – no effect, speech started and memory improved | 2,4 |  |  |  |
| **14** | - Epileptic encephalopathy (if diagnosed)  0 - absent  1 - observed  encefalopatia padaczkowa (czy jest rozpoznana) | Yes  Drug-resistant epilepsy | Yes  Myoclonic-astatic epilepsy | Yes  Generalized epilepsy G40.3. idiopathic epilepsy and epileptic syndromes. |  |  |  |
| **15** | - Brain MRI or CT scan  0 - normal  1 - minor changes (no significant clinical significance)  2 -serious malformations  zmiany w badaniu MR lub TK głowy | Resonance clear | Yes  MRI of the head (2018, 2019) showed small, band-like, non-specific high-signal densities in the white matter of the left occipital lobe in T2-weighted images and FLAIR sequence - changes of unmyelination | No focal changes in the brain. DVA in the left cerebellar hemisphere. |  |  |  |
| **16** | *Behavioral Psychiatric Manifestations*  - Autism spectrum disorder  0 - none  1 - ASD diagnosed [stereotypic behaviours such as hand flapping, obsessions with certain objects and poor social development. In addition, inattention, impulsivity, aggressive behaviour directed at self and others, elevated pain threshold, auditory hypersensitivity and sleep disturbance].  2 - confirmed autism  3 - behavioural disorders without diagnosis of autism or ASD  4 - other  zaburzenia ze spektrum autyzm | Autism  toys, fixations on round objects, lids, washing machine drum and their spinning. Sleep disturbances, screams with joy and protest, sometimes covers his ears, does not speak (only mom, dad, baba, bam, bye), stubborn, understands only simple commands, tries to force everything he wants by screaming. He likes patterns and repetitive activities, the same daily schedule, activities with the same person. He rebels and shouts when walking in the wrong direction. Problems returning home. When we introduce AAC, there are fewer tantrums and people are more willing to wait. | Autism ruled out, behavioral disorders  She bites furniture, walls, blankets, toys and his mother. She screams in anger and joy. Difficulty falling asleep and getting up. She understands simple commands, although he doesn't always follow them (I laugh). The noise irritates her. She is reluctant to leave his mother. At home she strips naked and refuses to get dressed.  She runs away and doesn't want to hold hands. She displays aggressive behavior only towards her mother. | No |  |  |  |
| **17** | - Behavioral abnormalities (describe) | As above | As above | Palms bent downwards; tantrums, a lot of communication in the form of screaming/squealing; sleep disorders. Attempting slurred speech with simultaneous rejection of first AAC attempts; bad reaction to stronger selected sounds; sensitivity to announcements from loudspeakers in public places/transport; irritability in the wind; |  |  |  |
| **18** | **MISCELLANEOUS**  - Onset in first years of life  0 - none  1 - minor/single (no diagnostics initiated)  2 -serious (diagnosis has been initiated)  objawy w 1 roku życia | From birth he was diagnosed with problems with muscle tone and congenital heart defect, aortic valve stenosis, fundus examination, raised disc in the left side.  Rehabilitation from the age of 3. He slept a lot until he was 8 months old, 18 hours a day.  Lack of interest in the surroundings, no reaction to strangers or my own, no reaction to mother, no eyes following objects | The child's development regressed after vaccination (DTP polio hib) in the 5th month of life. She stopped trying to get up, roll over, babbling, and from then on the disability became apparent.  After rehabilitation:  Crawling 11 months, walking 22 months  Milk allergies, nystagmus, developmental regression  Abnormal muscle tone and psychomotor development. Incorrect sitting posture. | There are few abnormalities in the first year of life. Problems sitting down; slightly reduced muscle tone. |  |  |  |
| **19** | - Most mutations occur de novo (yes/no)  mutacja de novo (rodzice jej nie mają) (tak/nie) | De novo | De novo | De novo |  |  |  |
| **20** | **MOLECULAR BASIS** |  |  |  |  |  |  |
| **21** | - Caused by mutation in the synaptic Ras GTPase activating protein 1 gene (SYNGAP1, [603384.0001](https://www.omim.org/entry/603384#0001)) (genetic results)  wynik badania genetycznego (nazwa wariantu) | c.509G>A  p.(Arg170Gln) | c:439_440Del  p.(Gln147Thrfs*4) | c.2115+89del177 |  |  |  |
| **22** | **Other important clinical notes** (może być po polsku)  0 - none  1- rather not  2 - clear  inne istotne objawy kliniczne | problems with swallowing and chewing, reluctance to drink, frequent loose stools, hypersensitivity to long noises, especially after school, has to go to sleep, sleep disorders, poor and delayed reaction to pain, poor eye-hand coordination, many food intolerances | Farsightedness +5, strabismus, nystagmus, problem with biting food, reduced pain threshold, problems with falling asleep and waking up | Myoclonus, sleep disorders, decreased response to pain and cold water; hypersensitivity to loud sounds and wind; constipation. |  |  |  |
| **23** | **Consent for publication of photos (anonymised, in medical publications and scientific conferences)**  **zgoda na ew. publikację zdjęć Dziecka (oczywiście anonimowo), na konferencjach naukowych i w pismach medycznych** | No | Yes | No |  |  |  |
|  |  |  |  |  |  |  |  |

AED:

Cbd – 1

Kwas walproinowy (depakina, convulex) – 2

Lamotrygina (Lamitrin, Lamortagine) – 3

Lewetyracetam (Vetira, Normeg, Keppra, Trund, Cezarius, Levacetam) – 4

Topiramat (Topamax, Epitoram) – 5

Solu Medrol – 6

Brywaracetam (Briviact) – 7

Dieta eliminująca tłuszcze – 8

Klobazam (Frisium) – 9

Lewetyracetam (Normeg) – 10

Klonazepam (Clonazepam, Rivotril) – 11

Okskarbazepina (Trileptal, Oxepilax) – 12

Wigabatryna (Sabril) – 13

Etosuksymid (Ethosuxsymid, Petnidan, Zarontin, Petinimid) – 14

Karbamazapina (Timonil, Tegretol) – 15

Dieta ketogenna – 16

Kalozotomia – 17

Fenobarbital (Luminal) – 18

Lakozamid (Vimpat) – 19

Gabapentyna (Gabapentin) – 20

Walproinian sodu (Orfiril) - 21
