# Supplementary material for: Molecular Characterization and Genotype-phenotype Correlations of SYNGAP1 Variants in a Polish Pediatric Cohort With Neurodevelopmental Disorders
Source: Research Square preprint supplement (doi:10.21203/rs.3.rs-7635804/v1), 2025-10-17
Supplement: Supplementary file 5 [file 73f6634a52eb54e0f4c7e666.docx]

Table 3. Clinical characteristic of the *SYNGAP1* variants

| Clinical Feature | Truncating Variants (n=5) | Splice-Site Variants (n=1) | Missense Variants (n=2) |
| --- | --- | --- | --- |
| Median Age at Study | 5 years | 4.5 years | 6.5 years |
| Seizures (any type) | 5/5 | 1/1 | 2/2 |
| Generalized Seizures | 4/5 (includes tonic-clonic, myoclonic, atypical) | 1/1 | 2/2 |
| — Typical Absences | 1 | 0 | 1 |
| — Atypical Absences | 3 | 1 | 1 |
| Developmental Delay | 5/5 (mostly significant: score 2) | 1/1 (score 2) | 2/2 (one moderate, one mild-to-moderate) |
| Developmental Regression | 4/5 (age range: 1.5–3 years, often with febrile trigger or after MMR vaccine) | 1/1 | 1/2 |
| Intellectual Disability | 3 severe, 2 moderate | 1 severe | 1 moderate, 1 mild |
| Hypotonia | All 5 patients (central hypotonia ± peripheral hypertonia/spasticity: scores 1–2) | Mixed hypotonia profile | Both missense patients showed mixed tone abnormality |
| Autism Spectrum Disorder (incl. atypical) | 5/5 (including atypical autism, behavioral autism spectrum phenotype, full ASD diagnosis) | 1/1 (confirmed behavioral ASD) | 2/2 (significant behavioral symptoms with or without ASD) |
| Severe Behavioral Problems | 5/5 (stereotypies, aggression, self-injury, hypersensitivity, oral fixation, etc.) | 1/1 | 2/2 |
