# Supplementary material for: Molecular Characterization and Genotype-phenotype Correlations of SYNGAP1 Variants in a Polish Pediatric Cohort With Neurodevelopmental Disorders
Source: Research Square preprint supplement (doi:10.21203/rs.3.rs-7635804/v1), 2025-10-17
Supplement: Supplementary file 6 [file bb3671651fd0db1107751da1.docx]

Table 2A. Neurological and developmental features of the Polish SYNGAP1 group.

| Feature | Scoring Definition |
| --- | --- |
| Microcephaly | 0 — absent; 1 — present |
| Torticollis | 0 — absent; 1 — present |
| Hypotonia | 0 — normal tone; 1 — reduced (central axis); 2 — increased (limbs); both allowed |
| Developmental delay | 0 — none; 1 — minor; 2 — significant delay |
| Intellectual disability | 0 — none; 1 — mild; 2 — moderate; 3 — severe (used for children ≥6 years old) |
| Developmental regression | 0 — not observed; 1 — observed |
