# Supplementary material for: Molecular Characterization and Genotype-phenotype Correlations of SYNGAP1 Variants in a Polish Pediatric Cohort With Neurodevelopmental Disorders
Source: Research Square preprint supplement (doi:10.21203/rs.3.rs-7635804/v1), 2025-10-17
Supplement: Supplementary file 7 [file c5199f71daa14ce7e87a8953.xlsx]

## Sheet: S1_tab
Patient no.	1	2	3	4	5	6	7	8	9	10	11	12	13	14	15	16	17	18	19	20	21	22	23	24	25	26	27	28	29	30
chr-pos-ref-alt (GRCh38)	6-33441731-C-T	6-33446710-C-T	6-33443897-TG-T	6-33432700-C-T	6-33440811-AGGCTTATCAGCGCCTCACTCTTCCTGCGCTTCC-A	6-33443924-AG-G	6-33443784-GTCAG-G	6-33443338-AC-A	6-33446787-G-A	6-33438071-CA-C	6-33443887-AG-A	6-33443316-C-T	6-33438156-TAAAG-T	6-33432197-CA-C	6-33437939-TG-T	6-33437827-T-C	6-33441696-AG-A	6-33432806-G-T	6-33432807-G-T	6-33435613-G-C	6-33438924-G-A	6-33423564-C-A	6-33432683-A-C	6-33443481-GC-G	6-33442913-CT-C	6-33440737-C-T	6-33437800-C-T	6-33432806-G-A	6-33432735-ACA-A	6-33441463_33441579del (modified due to variant length)
HGVSc (NM_006772.3)	c.2266C>T	c.3718C>T	c.3350del	c.403C>T	c.1760_1792del	c.3377del	c.3233_3236del	c.2789del	c.3794+1G>A	c.1167del	c.3338del	c.2764C>T	c.1253_1256del	c.333del	c.1036del	c.922T>C	c.2232del	c.509G>T	c.509+1G>T	c.762G>C	c.1676+5G>A	c.155C>A	c.388-2A>C	c.2933del	c.2362del	c.1685C>T	c.895C>T	c.509G>A	c.439_440del	c.2115+89_2116-2del
HGVSp (NP_006763.2)	p.(Gln756Ter)	p.(Arg1240Ter)	p.(Gly1117AlafsTer13)	p.(Arg135Ter)	p.(Arg587_Leu598delinsIle)	p.(Gly1126ValfsTer4)	p.(Val1078AlafsTer51)	p.(Pro930LeufsTer147)	p.?	p.(Gly391AlafsTer12)	p.(Gly1113AlafsTer17)	p.(Arg922Ter)	p.(Lys418SerfsTer21)	p.(Lys114SerfsTer20)	p.(Val346Ter)	p.(Trp308Arg)	p.(Gln744HisfsTer16)	p.?;p.(Arg170Leu)	p.?	p.?;p.(Lys254Asn)	p.?	p.(Ser52Ter)	p.?	p.(Pro978HisfsTer99)	p.(Ser788ProfsTer21)	p.(Pro562Leu)	p.(Arg299Cys)	p.?;p.(Arg170Gln)	p.(Gln147ThrfsTer4)	p.?
Variant type	Truncating	Truncating	Truncating	Truncating	Missense and in-frame indel	Truncating	Truncating	Truncating	Splicing	Truncating	Truncating	Truncating	Truncating	Truncating	Truncating	Missense and in-frame indel	Truncating	Splicing; Missense and in-frame indel	Splicing	Splicing; Missense and in-frame indel	Splicing	Truncating	Splicing	Truncating	Truncating	Missense and in-frame indel	Missense and in-frame indel	Splicing; Missense and in-frame indel	Truncating	Splicing; Non-coding indel
Variant subtype	Nonsense, NMD predicted	Nonsense, NMD predicted	Deletion, frameshift, NMD predicted	Nonsense, NMD predicted	In-frame indel	Deletion, frameshift, NMD predicted	Deletion, frameshift, NMD predicted	Deletion, frameshift, NMD predicted	Splicing, canonical site (donor loss)	Deletion, frameshift, NMD predicted	Deletion, frameshift, NMD predicted	Nonsense, NMD predicted	Deletion, frameshift, NMD predicted	Deletion, frameshift, NMD predicted	Nonsense, NMD predicted	Missense	Deletion, frameshift, NMD predicted	Splicing, noncanonical site (donor loss); Missense	Splicing, canonical site (donor loss)	Splicing, noncanonical site (donor loss); Missense	Splicing, noncanonical site (donor loss)	Nonsense, NMD predicted	Splicing, canonical site (acceptor loss)	Deletion, frameshift, NMD predicted	Deletion, frameshift, NMD predicted	Missense	Missense	Splicing, non-canonical site (donor loss); Missense	Deletion, frameshift, NMD predicted	Splicing, non-coding indel covering canonical site (acceptor loss)
ACMG classification	Pathogenic	Pathogenic	Pathogenic	Pathogenic	Likely pathogenic	Pathogenic	Pathogenic	Pathogenic	Pathogenic	Pathogenic	Pathogenic	Pathogenic	Pathogenic	Pathogenic	Pathogenic	Pathogenic	Pathogenic	Pathogenic	Pathogenic	Likely pathogenic	Likely pathogenic	Pathogenic	Pathogenic	Pathogenic	Pathogenic	Pathogenic	Likely pathogenic	Pathogenic	Pathogenic	Pathogenic
ACMG codes	PVS1 + PS2 + PM2_Supporting	PVS1 + PS4 + PS2_VeryStrong + PM2_Supporting	PVS1 + PS2 + PM2_Supporting	PVS1 + PS4 + PS2_VeryStrong + PM2_Supporting	PS2 + PM4 + PP3 + PM1_Supporting + PM2_Supporting	PVS1 + PS2 + PM2_Supporting	PVS1 + PS4_Moderate + PS2 + PM2_Supporting	PVS1 + PS2 + PM2_Supporting	PVS1 + PS1_Supporting + PS2 + PM2_Supporting	PVS1 + PS4_Supporting + PS2_Moderate + PM2_Supporting	PVS1 + PS2 + PM2_Supporting	PVS1 + PS4 + PS2_VeryStrong + PM2_Supporting	PVS1 + PS2 + PM2_Supporting	PVS1 + PS4 + PS2_VeryStrong + PM2_Supporting	PVS1 + PS2 + PM2_Supporting	PS2_VeryStrong + PS4_Moderate + PM1_Supporting + PM2_Supporting + PM5_Supporting + PP3_Moderate + PP2	PVS1 + PS2 + PM2_Supporting	PS1 + PS2 + PM2_Supporting + PP3	PVS1 + PS1_Supporting + PS2 + PS4_Supporting + PM2_Supporting	PS2 + PS1_Moderate + PM2_Supporting + PP3	PS2 + PS1_Supporting + PM2_Supporting + PP3	PVS1 + PS2 + PM2_Supporting	PVS1 + PS2 + PS4_Supporting + PM2_Supporting	PVS1 + PS2 + PM2_Supporting	PVS1 + PS2 + PM2_Supporting	PS2_VeryStrong + PS3_Supporting + PM2_Supporting+ PP2 + PP3_Moderate	PS2 + PS4_Supporting + PM2_Supporting + PP2 + PP3	PS4_Supporting + PS2_Very_Strong + PM2_Supporting + PP3	PVS1 + PS2 + PM2_Supporting	PVS1 + PS2 + PM2_Supporting
Novel/known	Known	Known	Novel	Known	Novel	Novel	Known	Novel	Novel	Known	Novel	Known	Novel	Known	Novel	Known	Novel	Known	Known	Known	Novel	Novel	Known	Novel	Novel	Known	Known	Known	Novel	Novel
De novo/inherited	De novo	De novo	De novo	De novo	De novo	De novo	De novo	De novo	De novo	De novo	De novo	De novo	De novo	De novo	De novo	De novo	De novo	De novo	De novo	De novo	De novo	De novo	De novo	De novo	De novo	De novo	De novo	De novo	De novo	De novo
Protein domain affected if missense/in-frame					Ras-GAP											C2		PH		C2						Ras-GAP	C2	PH
Exon	13	17	15	5	11	15	15	15	17	8	15	15	8	4	8	8	13	5	5	7	10	2	5	15	15	11	8	5	5	13
