# Supplementary material for: Molecular Characterization and Genotype-phenotype Correlations of SYNGAP1 Variants in a Polish Pediatric Cohort With Neurodevelopmental Disorders
Source: Research Square preprint supplement (doi:10.21203/rs.3.rs-7635804/v1), 2025-10-17
Supplement: Supplementary file 8 [file d9863f6e485efac08882bdf5.docx]

INTELLECTUAL DEVELOPMENTAL DISORDER, AUTOSOMAL DOMINANT 5; MRD5 - Neurological and behavioral characteristics of Polish patients

**INHERITANCE**

- Autosomal dominant

Table. Clinical and molecular characteristics of 21 Polish MRD5 Patients

**part 1 (pts 1-7)**

| **L.P** |  | **1** | **2** | **3** | **4** | **5** | **6** | **7** |
| --- | --- | --- | --- | --- | --- | --- | --- | --- |
| **1** | **inicjały Dziecka + data diagnozy + nazwisko lekarza** (opcja, jeśli jest jako prowadzący) | M.O. (2010)  Maja Ołów  2017 (7,5 roku)  dr Kiryluk | R. N (2019)  Radosław Nestorowicz  Wes 2021 (2,5 roku)  dr Łukasz Przysło | D.T. (2009)  Dobrosława Tybor  2021 (12 lat) | Z.Cz (2019)  Zyzanna Czerwonka  2021 (3 lata) | KK (2017)  Kasia Klein  2020 (3 lata) | J.S (2018)  Julia Strzępka  2021 (2,5 roku) | A.K. (2012)  Ania Kosmala  2018 (6 lat)  Alicja Goszczańska- Ciuchta |
| **2** | **HEAD & NECK** |  |  |  |  |  |  |  |
| **3** | *Head*  - Microcephaly (in some patients)  0 - absent  1- present  małogłowie | 1 | 0 | 0 | 0 | 0 | 0 | 0 |
| **4** | *Neck*  - Torticollis (in some patients)  0 – absent  1- present  kręcz szyi | 0 | 0 | 0 | 0 | 0 | 0 | 0 |
| **5** | **NEUROLOGIC** |  |  |  |  |  |  |  |
| **6** | *Central Nervous System* |  |  |  |  |  |  |  |
| **7** | - Hypotonia  0 - normal  1 - reduced in long axis  2 - increased in limbs/contractions  (> 1 answer possible)  obniżone napięcie mięśni | 1 | 1,2 | 1 | 1,2 | 1 | 1 | 1,2 |
| **8** | - Delayed development  0 - no delays  1 - minor delays  2 - significant delays  opóźnienie rozwoju | 1 | 2 | 2 | 1 | 2 | 2 | 2 |
| **9** | - Intellectual disability, mild to severe  0 - no  1- mild  2 - moderate  3 - severe  niepełnosprawność intelektualna  !! po 6 roku życia (wcześniej mówimy o opóźnieniu rozwoju) | 1 | 2 | 2 | 2 | 2 | 2 | 2 |
| **10** | - Developmental regression  0 - none  1- observed  regres rozwoju | 1 | 0 | 0 | 0 | 0 | 1 | 1 |
| **11** | - Seizures (morphology)  0 - no seizures  1 - absence  2 - mioclonus  3 - tonic-clonic seizures  4 - only seizures during sleep  drgawki/padaczka (rodzaj napadów) | 1,2 | 2 | 1,2 | 1 | 1 |  | 1,2 |
| **12** | - EEG abnormalities (describe)  0 - normal  1 - generalised seizure changes  2 - other seizure changes  zapis EEG | 1 | 1 | 1 | 1 | 1 | 1 | 1 |
| **13** | - Antiepileptic drugs (current and earlier)  stosowane obecnie i wcześniej leki p/padaczkowe | 1, 2,4,5,9,14,15, | 1,2,4,6,7 | 2,11 | 2 | 1,2,3 | 2 | 2,3,5,6,7,9,10, |
| **14** | - Epileptic encephalopathy (if diagnosed)  0 - absent  1 - observed  encefalopatia padaczkowa (czy jest rozpoznana) | 1 | 1 | 1 | 1 | 1 | 1 | 1 |
| **15** | - Brain MRI or CT scan  0 - normal  1 - minor changes (no significant clinical significance)  2 -serious malformations  zmiany w badaniu MR lub TK głowy | 0 | 1 | 0 | 1 | 0 | 0 | 0 |
| **16** | *Behavioral Psychiatric Manifestations*  - Autism spectrum disorder  0 - none  1 - ASD diagnosed [stereotypic behaviours such as hand flapping, obsessions with certain objects and poor social development. In addition, inattention, impulsivity, aggressive behaviour directed at self and others, elevated pain threshold, auditory hypersensitivity and sleep disturbance].  2 - confirmed autism  3 - behavioural disorders without diagnosis of autism or ASD  4 - other  zaburzenia ze spektrum autyzm | 1 | 1 | 1 | 1 | 1 | 1 | 1 |
| **17** | - Behavioral abnormalities (describe) | Stubbornness, stereotypes (spinning around, shaking hands, jumping, moving legs), limited interests, eagerness to impose one's own opinion on others, dislikes change, not very sociable, avoids noisy places, must have a fixed timetable, does not know what metaphor is (only recognises direct speech), hates the word unlimited eye contact | behavioural disorders, SI disorder, wiggles hands and has them bent all the time, bites hands or chews, bruxism, loves tapping and knocking, tilts head back, strokes self to sleep, sleep disorder, shouts for joy, plugs ears often, does not speak, pulls shoulders to head, cries in the wind, stubborn | - | SI disorder (walks barefoot, dislikes nail clipping). Vestibular, tactile and proprioceptive hypersensitivity. Quickly gets discouraged and frustrated when can't do something. | very contactable but non-verbal, autistic behaviour, self-aggression | non-verbal child, when afraid or insecure plugs ears, reacts very poorly to commands | jumps, shakes hands, is mainly interested in toys with sounds and lights, bites, pinches, slaps her hand on her face, looks at her hands |
| **18** | **MISCELLANEOUS**  - Onset in first years of life  0 - none  1 - minor/single (no diagnostics initiated)  2 -serious (diagnosis has been initiated)  objawy w 1 roku życia | 1 | 2 | 1 | 1 | 1 | 2 | 1 |
| **19** | - Most mutations occur de novo (yes/no)  mutacja de novo (rodzice jej nie mają) (tak/nie) | de novo | de novo | de novo | de novo | de novo, | de novo | de novo |
| **20** | **MOLECULAR BASIS** |  |  |  |  |  |  |  |
| **21** | - Caused by mutation in the synaptic Ras GTPase activating protein 1 gene (SYNGAP1, [603384.0001](https://www.omim.org/entry/603384#0001)) (genetic results)  wynik badania genetycznego (nazwa wariantu) | c.2266C>T  p.Gln756Ter | c:3718C>T  p.Arg1240*  6:33446710 | c3550del  p.(Gly1117AlafsTer13)  novel | c.403C>T p.Arg135*  (epileptic panel) | c.1760_1792del33  p.R587_L598delinsl | p.Gly1126ValfsTer4 | p.Val1078Alafs*51 |
| **22** | **Other important clinical notes** (może być po polsku)  0 - none  1- rather not  2 - clear  inne istotne objawy kliniczne | 2  tall for age 152 cm /47 kg (9 years; birth weight - 3280 g, length 59 cm)  height of parents - mother 168 cm, - father approx. 180 cm  precocious puberty | 2  astigmatism, hyperopia, nystagmus, overactive lower muscles of both eyes, swallowing and chewing problems, reluctance to drink, constipation, hypersensitivity to wind and light, sleep disturbances, poor response to pain | 2  hypothyroidism  increased pain tolerance  recurrent nosebleeds  impaired auditory processing | 2  hyperlordosis, sit in W.  poor concentration  drooling  lack of awareness of danger. | 2  nystagmus, astigmatism anisometropia, intermittent exotropia, abdominal bloating with cramps, global developmental delay, lactose intolerance, apraxia of speech, autism, motor delay, sensory processing difficulty, epilepsy, intellectual disability | 1  SI disorders,  joint hypermobility | 2  myopia, horizontal nystagmus |
| **23** | **Consent for publication of photos (anonymised, in medical publications and scientific conferences)**  **zgoda na ew. publikację zdjęć Dziecka (oczywiście anonimowo), na konferencjach naukowych i w pismach medycznych** | yes | yes | yes | yes | yes | yes | yes |

part 2 (pts 8-14)

| **L.P** |  | **8** | **9** | **10** | **11** | **12** | **13** | **14** |
| --- | --- | --- | --- | --- | --- | --- | --- | --- |
| **1** | **inicjały Dziecka + data diagnozy + nazwisko lekarza** (opcja, jeśli jest jako prowadzący) | A.B (2008)  Amelia Brzozka  2019 (11 lat) | A.D. (2017)  Alicja Dawid  2022 (4,5 roku) | M.W. (2007)  Mateusz Wąsik  2020 (13 lat)  Lekarz  M.B  B.J | S.S (2010)  Szymon Sobiegraj  2019 (9 lat) | K.N (2013).  Krystian Nieszczerzewski  2017 (4 lata)  Lekarz A. W.-W. | M. G (2015)  Miłosz Garbal  2018 (3 lata)  lekarz dr Iwona Żarnowska | LS (2013)  Lena Stolarska  2020 (7 lat)  Lekarz Domanska-Pakieła |
| **2** | **HEAD & NECK** |  |  |  |  |  |  |  |
| **3** | *Head*  - Microcephaly (in some patients)  0 – absent  1- present  małogłowie | 0 | 0 | 0 | 0 | 0 | 1 | 0 |
| **4** | *Neck*  - Torticollis (in some patients)  0 – absent  1- present  kręcz szyi | 0 | 0 | 0 | 0 | 0 | 0 | 0 |
| **5** | **NEUROLOGIC** |  |  |  |  |  |  |  |
| **6** | *Central Nervous System* |  |  |  |  |  |  |  |
| **7** | - Hypotonia  0 - normal  1 - reduced in long axis  2 - increased in limbs/contractions  (> 1 answer possible)  obniżone napięcie mięśni | 1 | 1,2 | 1,2 | 1 | 1,2 | 1,2 | 1 |
| **8** | - Delayed development  0 - no delays  1 - minor delays  2 - significant delays  opóźnienie rozwoju | 2 | 2 | 2 | 2 | 2 | 2 | 1 |
| **9** | - Intellectual disability, mild to severe  0 - no  1 - mild  2 - moderate  3 - severe  niepełnosprawność intelektualna  !! po 6 roku życia (wcześniej mówimy o opóźnieniu rozwoju) | 2 | 2 | 3 | 2 | 2 | 2 | 1 |
| **10** | - Developmental regression  0 - none  1- observed  regres rozwoju | 0 | 0 | 1 | 0 | 0 | 0 | 0 |
| **11** | - Seizures (morphology)  0 - no seizures  1 - absence  2 - mioclonus  3 - tonic-clonic seizures  4 - only seizures during sleep  drgawki/padaczka (rodzaj napadów) | 1,2 | 1,2 | 1,2 | 2 | 1,2 | 1,2 | 4 |
| **12** | - EEG abnormalities (describe)  0 - normal  1 - generalised seizure changes  2 - other seizure changes  zapis EEG | 1 | 1 | 1 | 1 | 1 | 1 | 1 |
| **13** | - Antiepileptic drugs (current and earlier)  stosowane obecnie i wcześniej leki p/padaczkowe | 1,2,3,5,12,13,  14 | 1 | 1,2,3. | 1,2,4,12,15 | 2,4,14, 16 | 2,16 | 2,3,4 |
| **14** | - Epileptic encephalopathy (if diagnosed)  0 - absent  1 - observed  encefalopatia padaczkowa (czy jest rozpoznana) | 1 | 1 | 1 | 1 | 1 | 1 | 1 |
| **15** | - Brain MRI or CT scan  0 - normal  1 - minor changes (no significant clinical significance)  2 -serious malformations  zmiany w badaniu MR lub TK głowy | 0 | 1 | 2 | 1 | 0 | 0 | 1 |
| **16** | *Behavioral Psychiatric Manifestations*  - Autism spectrum disorder  0 - none  1 - ASD diagnosed [stereotypic behaviours such as hand flapping, obsessions with certain objects and poor social development. In addition, inattention, impulsivity, aggressive behaviour directed at self and others, elevated pain threshold, auditory hypersensitivity and sleep disturbance].  2 - confirmed autism  3 - behavioural disorders without diagnosis of autism or ASD  4 - other  zaburzenia ze spektrum autyzm | 1 | 1 | 1 | 1 | 1 | 1 | 0 |
| **17** | - Behavioral abnormalities (describe) | SI disorders, auditory hypersensitivity, auto-aggression, fixations, obsessions | Basically, it's just stubbornness. She wants to act on her own rules, doesn't like things being imposed on her - then she starts biting and pinching. Other than that, I don't see autistic traits - she clings to children and tries to imitate them, great intention to communicate, shares the field of attention, points her finger. | Numerous stereotypes and fixations | Fixations on certain things, strange behaviours, patterns of doing things from to and back again, running from one point to another and back again. Sensory integration disorder, hypersensitivity to touch and sounds, fear of small children. Needs attention, someone to be with him all the time and preferably to hold his hand. | Stereotypes, self-stimulations and fixations; at one time self-aggression; sometimes aggression and shouting when something is not to his liking (but less and less);  Otherwise very communicative, sociable, likes novelty and change of environment | stereotypes, tactile hypersensitivity, auditory hypersensitivity, waving hands, biting, screaming, kicking, | - |
| **18** | **MISCELLANEOUS**  - Onset in first years of life  0 - none  1 - minor/single (no diagnostics initiated)  2 -serious (diagnosis has been initiated)  objawy w 1 roku życia | 1 | 1 | 0 | 1 | 2 | 1 | 1 |
| **19** | - Most mutations occur de novo (yes/no)  mutacja de novo (rodzice jej nie mają) (tak/nie) | de novo | de novo | de novo | de novo | de novo | de novo | de novo. |
| **20** | **MOLECULAR BASIS** |  |  |  |  |  |  |  |
| **21** | - Caused by mutation in the synaptic Ras GTPase activating protein 1 gene (SYNGAP1, [603384.0001](https://www.omim.org/entry/603384#0001)) (genetic results)  wynik badania genetycznego (nazwa wariantu) | c.2789del  p.Pro930Leufs*147 | c:3794+1G>A | c.1167delA  p.(Gly391AlafsTer12) | c.3338delG p. (Gly1113AlafsTer17) | c.2764C>T  p.Arg922Ter | C.1252_1255del p.(Lys.418Serfs*21) | C333 del, ekson 4 |
| **22** | **Other important clinical notes** (może być po polsku)  0 - none  1- rather not  2 - clear  inne istotne objawy kliniczne | 0 | 1  very tall for her age - 5 years and 5 months: weight 27 kg, height 123 cm [birth weight 2.900 g and length 53 cm; mother 164 cm, father 175 cm] | 0 | 0 | 0 | 0 | 0 |
| **23** | **Consent for publication of photos (anonymised, in medical publications and scientific conferences)**  **zgoda na ew. publikację zdjęć Dziecka (oczywiście anonimowo), na konferencjach naukowych i w pismach medycznych** | yes | yes | yes | yes | yes | yes | yes |

**part 3 (pts 15-21)**

| **L.P** |  | **15** | **16** | **17** | **18** | **19** | **20** | **21** |
| --- | --- | --- | --- | --- | --- | --- | --- | --- |
| **1** | **inicjały Dziecka + data diagnozy + nazwisko lekarza** (opcja, jeśli jest jako prowadzący) | JO (2006)  Jan Olszewski  Diagnoza 2019 (13 lat)  wcześniej Szymańska, teraz Bachański | P.W (2007)  Piotr Wyderka  2015 (9 lat)  (dr E.R -S) | N.B (2015),  Naira Baratova  2019 (4 lata)  Dr. Bachanski | L.B (2016).  Leu Baravic  2018 (2 lata) | T. H (2016).  Taisiia Glinka  2020 (3 lata)  Ewa Yakonyuk, pediatrician | H.D (2012)  Helena Dudczak  2020 (9 lat) | E.E (2013)  Eryk Ehlert  2018 (4,5 roku)  Wierzba-genetyk |
| **2** | **HEAD & NECK** |  |  |  |  |  |  |  |
| **3** | *Head*  - Microcephaly (in some patients)  0 – absent  1- present  małogłowie | 0 | 0 | 0 | 0 | 0 | 0 | 0 |
| **4** | *Neck*  - Torticollis (in some patients)  0 – absent  1- present  kręcz szyi | 0 | 0 | 0 | 0 | 1 | 0 | 0 |
| **5** | **NEUROLOGIC** |  |  |  |  |  |  |  |
| **6** | *Central Nervous System* |  |  |  |  |  |  |  |
| **7** | - Hypotonia  0 - normal  1 - reduced in long axis  2 - increased in limbs/contractions  (> 1 answer possible)  obniżone napięcie mięśni | 1 | 1,2 | 1 | 1 | 1 | 0 | 1 |
| **8** | - Delayed development  0 -no delays  1 - minor delays  2 -significant delays  opóźenienie rozwoju | 2 | 2 | 2 | 2 | 2 | 1 | 2 |
| **9** | - Intellectual disability, mild to severe  0 - no  1 - mild  2 - moderate  3 - severe  niepełnosptawnośc intelektualna  !! po 6 roku życia (wcześniej mówimy o opóźnienieu rozwoju) | 3 | 3 | 3 | 2 | 2. | 2 | 2 |
| **10** | - Developmental regression  0 - none  1- observed  regres rozwoju | 1 | 1 | 0 | 0 | 0 | 0 | 0 |
| **11** | - Seizures (morphology)  0 - no seizures  1 - absence  2 - mioclonus  3 - tonic-clonic seizures  4 - only seizures during sleep  drgawki/padaczka (rodzaj napadów) | 1,2 | 1,2,3 | 1,2 | 1,2 | 1,2 | 0 | 1,2 |
| **12** | - EEG abnormalities (describe)  0 - normal  1 - generalised seizure changes  2 - other seizure changes  zapis EEG | 1 | 1 | 1 | 1 | 1 | 0 | 1 |
| **13** | - Antiepileptic drugs (current and earlier)  stotowane obecnie i wcześniej leki p/padaczkowe | 1,2,3,4,5 | 2,3,4,5,9,12,13,14, 17,18,19,20,21 | 1,2,16 | 3,4, 14 | 2, 4, 5,11 | 0 | 2,4 |
| **14** | - Epileptic encephalopathy (if diagnosed)  0 - absent  1 - observed  encefalopatia padaczkowa (czy jest rozpoznana) | 1 | 1 | 1 | 1 | 1 | 0 | 1 |
| **15** | - Brain MRI or CT scan  0 - normal  1 - minor changes (no significant clinical significance)  2 -serious malformations  zmiany w badaniu MR lub TK głowy | 0 | 0 | 0 | 0 | 0 | 0 | 0 |
| **16** | *Behavioral Psychiatric Manifestations*  - Autism spectrum disorder  0 - none  1 - ASD diagnosed [stereotypic behaviours such as hand flapping, obsessions with certain objects and poor social development. In addition, inattention, impulsivity, aggressive behaviour directed at self and others, elevated pain threshold, auditory hypersensitivity and sleep disturbance].  2 - confirmed autism  3 - behavioural disorders without diagnosis of autism or ASD  4 - other  zaburzenia ze spektrum autyzm | 1 | 1 | 1 | 1 | 1 | 1 | 1 |
| **17** | - Behavioral abnormalities (describe) | very sociable, very fond of children, rather like to follow his interests, loves big animals: cows, horses, elephants. He plays with them all the time, feeds them, cleans them, live also:) he likes very much to play "as if", he loves music and musical instruments, he likes to dance, but he is "fixated" on it. Very cheerful, sociable, cheerful, sometimes attacks of aggression (maybe puberty?) | constantly on  moving, unable to sit still, does not  needs  to be with  other children,  SI disorder in  face and  hands (difficulty  with cutting  hair, nails).  Likes toys  that make  sounds and lights up,  used to  used to get excited about  wind (now  less) | diagnosed with ASD, presents multiple symptoms of autism, such as lack of eye contact, pointing gesture. She doesn’t feel the need to socialize. Had multiple sensory issues in the past which we were able to overcome with the help of sensory integration and ABA therapy. Still has tantrums, aggrssion, and autoagression. | diagnosed with ASD. good contact with adults but does not like children and does not play. as if they do not exist.  loves big animals. very fond of music and musical instruments, likes to dance. Likes to sing. But words cannot be tolerated. There is very strong aggression, tantrums. | diagnosed with ASD, has repetitive movements, vocal stimming, impatience, melt downs, doesn’t understand danger. Doesn’t like some sounds, like vacuum cleaner. Aggression and autoagression. Likes other children, but prefers to play on her own. Has limited contact with other kids. | She walks a lot in the mountains, she can walk about 10 h uphill without getting tired. She swims, rides horses, is sociable, does not shy away from touch, likes pressure but also gentle stroking, has no problems with eye contact, likes animals but different from all children e.g. chickens, large horses. She is cheerful and smiling but often fixates on activities i.e. watching the fire , sifting sand, waterfalls, streams, sea, waves. She has been food selective for some time. | very mobile, very fond of contact with other children, loves to dance, SI disorder, excitement about trains, buses, trams |
| **18** | **MISCELLANEOUS**  - Onset in first years of life  0 - none  1 - minor/single (no diagnostics initiated)  2 -serious (diagnosis has been initiated)  objawy w 1 roku życia | 1 | 2 | 1 | 1 | 1 | 1 | 1 |
| **19** | - Most mutations occur de novo (yes/no)  mutacja de novo (rodzice jej nie mają) (tak/nie) | de novo | de novo | de novo | de novo | de novo | de novo | de novo |
| **20** | **MOLECULAR BASIS** |  |  |  |  |  |  |  |
| **21** | - Caused by mutation in the synaptic Ras GTPase activating protein 1 gene (SYNGAP1, [603384.0001](https://www.omim.org/entry/603384#0001)) (genetic results)  wynik badania genetycznego (nazwa wariantu) | c.1036deIG,zapis na poziomie białka p. (Val346Ter), pozycja chromosomowa **6:033437939-TG>T | c.922T>C | c.2232delG | chr6:33400583c.509G>T | c.509+1G>T9(splice donor) | c.762G>C p.(LYS254Asn) | c.1676+5G>A |
| **22** | **Other important clinical notes** (może być po polsku)  0 - none  1- rather not  2 - clear  inne istotne obajwy kliniczne | 0 | 0 | 0 | 0 | 0 | 0 | 1 |
| **23** | **Consent for publication of photos (anonymised, in medical publications and scientific conferences)**    **zgoda na ew. publikację zdjęć Dziecka (oczywiście anonimowo), na konferencjach naukowych i w pismach medycznych** | yes | yes | yes | yes | yes | yes | yes |

AED:

Cbd – 1

Kwas walproinowy (depakina, convulex) – 2

Lamotrygina (Lamitrin, Lamortagine) – 3

Lewetyracetam (Vetira, Normeg, Keppra, Trund, Cezarius, Levacetam) – 4

Topiramat (Topamax, Epitoram) – 5

Solu Medrol – 6

Brywaracetam (Briviact) – 7

Dieta eliminująca tłuszcze – 8

Klobazam (Frisium) – 9

Lewetyracetam (Normeg) – 10

Klonazepam (Clonazepam, Rivotril) – 11

Okskarbazepina (Trileptal, Oxepilax) – 12

Wigabatryna (Sabril) – 13

Etosuksymid (Ethosuxsymid, Petnidan, Zarontin, Petinimid) – 14

Karbamazapina (Timonil, Tegretol) – 15

Dieta ketogenna – 16

Kalozotomia – 17

Fenobarbital (Luminal) – 18

Lakozamid (Vimpat) – 19

Gabapentyna (Gabapentin) – 20

Walproinian sodu (Orfiril) - 21
